# Supplementary material for: A Silicone Resin Coating with Water-Repellency and Anti-Fouling Properties for Wood Protection
Source: MDPI journal article supplement (doi:10.3390/polym14153062), 2022-07-28
Supplement: s1 [file s1]

# Supplementary Materials

Zehao Ding, Wensheng Lin, Wenbin Yang, Hanxian Chen \* and Xinxiang Zhang \*

College of Materials Engineering, Fujian Agriculture and Forestry University, Fuzhou 350108, China; 15396095156@163.com (Z.D.); wensheng0817@163.com (W.L.); fafuywb@163.com (W.Y.)

\* Correspondence: hanxian1229@163.com (H.C.); xxzhang0106@163.com (X.Z.)

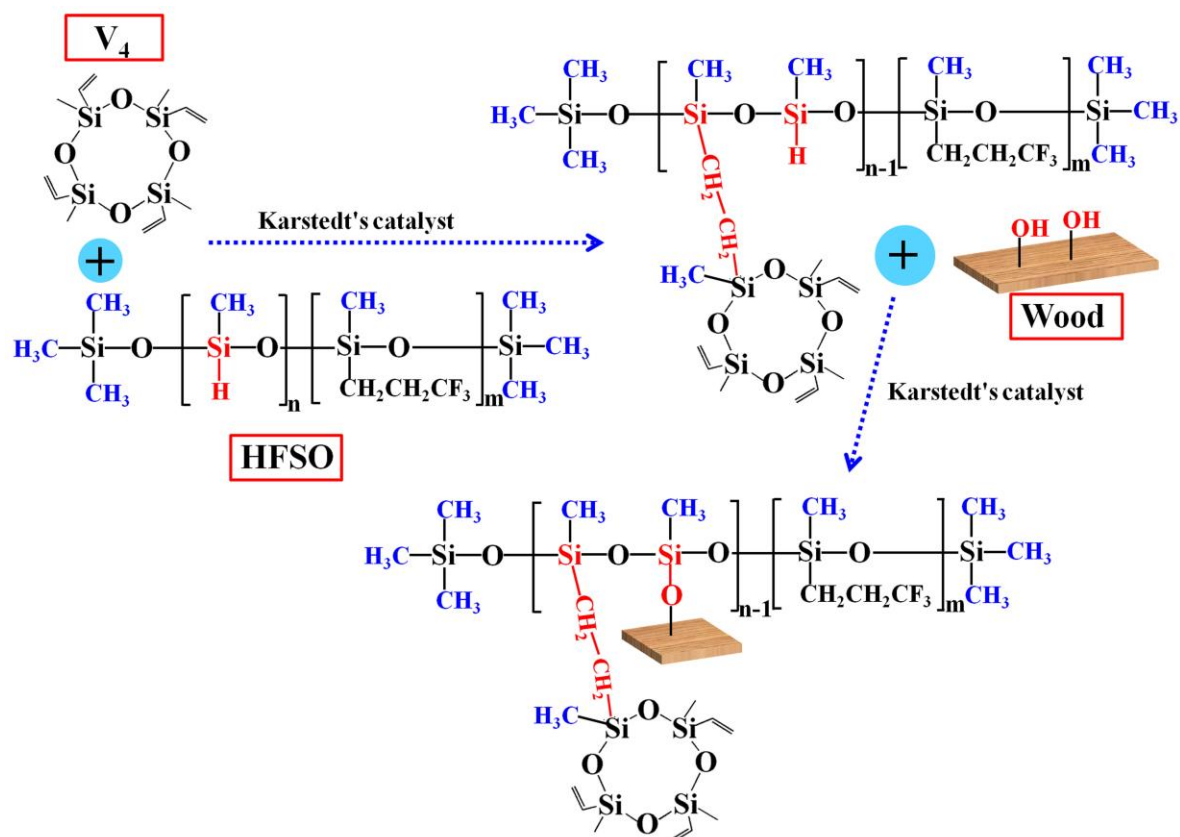

Figure S1: Schematic diagram of grafting silicone resin on wood surface

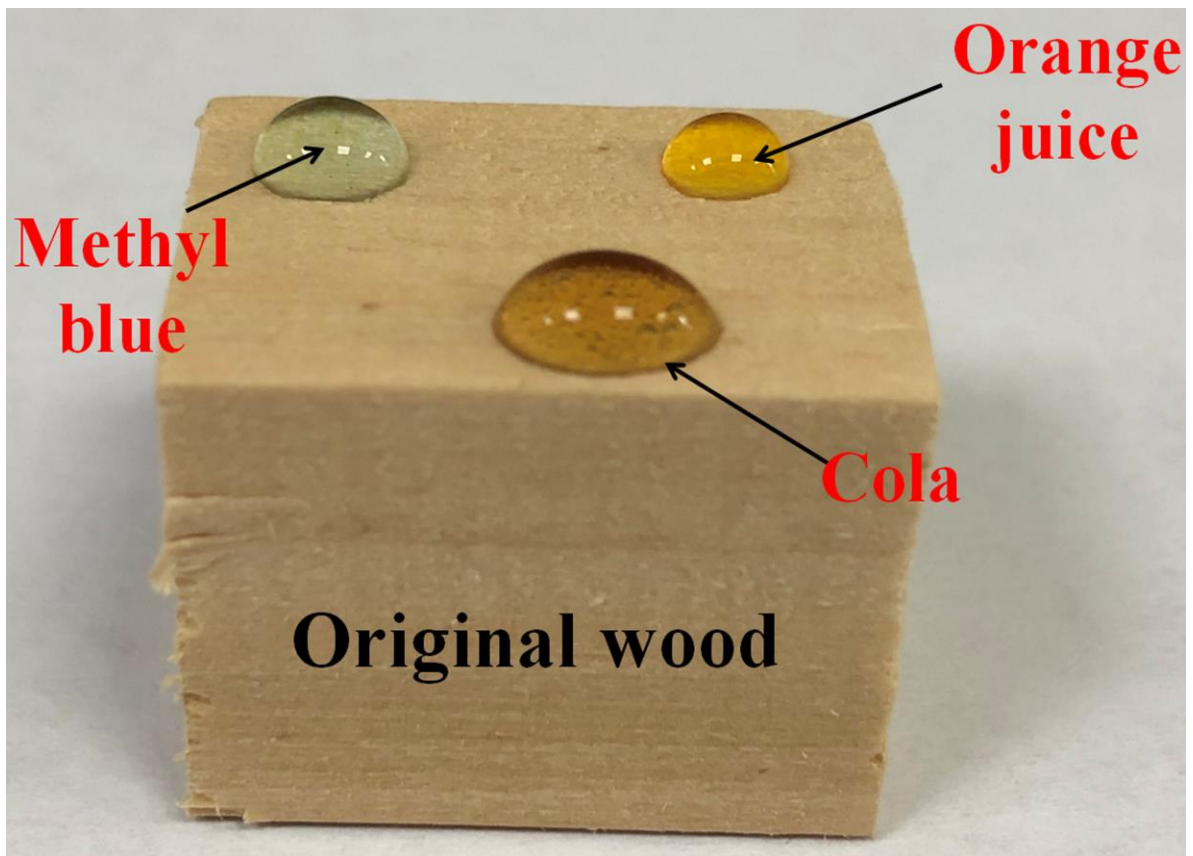

Figure S2: Anti-fouling resistance of unmodified wood
